# Supplementary material for: Tension Stimulation of Tenocytes in Aligned Hyaluronic Acid/Platelet-Rich Plasma-Polycaprolactone Core-Sheath Nanofiber Membrane Scaffold for Tendon Tissue Engineering
Source: MDPI journal article supplement (doi:10.3390/ijms222011215), 2021-10-18
Supplement: s1 [file s1]

## Supplementary Material

### Tension Stimulation of Tenocytes in Aligned Hyaluronic Acid/Platelet-Rich Plasma-Polycaprolactone Core-Sheath Nanofiber Membrane Scaffold for Tendon Tissue Engineering

#### Release of Growth Factor

For nanofibers containing PRP (Random<sup>+</sup> and Align<sup>+</sup>), the release of platelet-derived growth factor-BB (PDGF-BB), an important growth factor in PRP, was determined. A core-sheath nanofiber membrane scaffold (CSNMS) was cut into 1.5-cm disks and immersed in 1 mL of phosphate buffered saline (PBS) solution (pH 7.4) at 37 °C. At predetermined time, the PBS was removed and replenished with fresh PBS for up to 14 days. The amount of released PDGF-BB was quantified using enzyme-linked immunosorbent assay (ELISA) with a PDGF-BB Human ELISA kit from Thermo Fisher Scientific. The cumulative percentage of PDGF-BB released from CSNMS was calculated by normalizing with pristine growth factor content in the CSNMS, determined before electrospinning with ELISA.

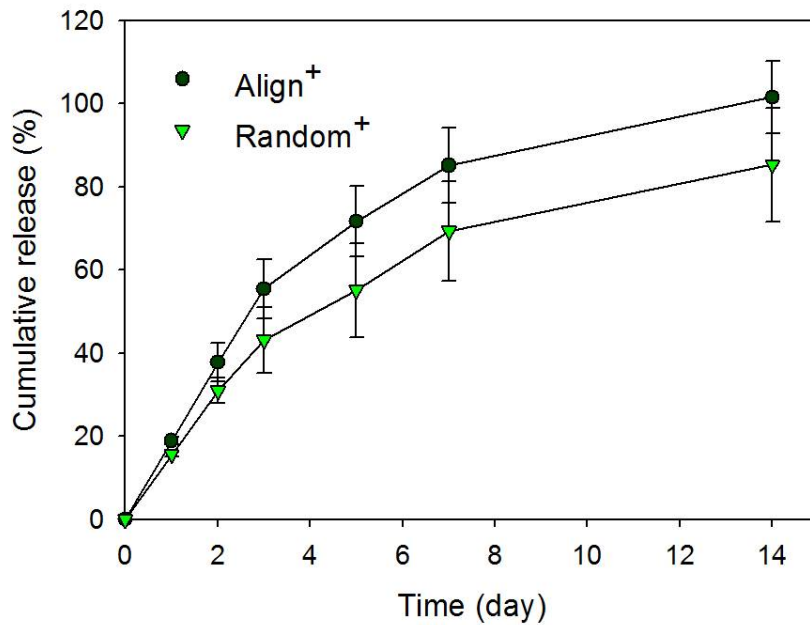

**Figure S1.** The in vitro release profile of platelet-derived growth factor-BB (PDGF-BB) from Random<sup>+</sup> or Align<sup>+</sup> core-sheath nanofiber membrane scaffold (CSNMS) in PBS at 37 °C. The amount of released PDGF-BB is quantified with an enzyme-linked immunosorbent assay (ELISA) kit and normalized with pristine PRP used for preparing the CSNMS.

### Tenocyte Culture with Extracts from Core-Sheath Nanofiber Membrane (CSNMS)

The Random, Random<sup>+</sup> or Align<sup>+</sup> CSNMS was extracted separately with 2 mL cell culture medium for 3 days. The extract was used for culture  $1 \times 10^4$  tenocytes/well in a 24-well tissue culture polystyrene (TCPS) cell culture plate. The viable cell number was determined from MTS assay at different time points using the CellTiter 96® AQueous One Solution Cell Proliferation Assay kit from Progenia.

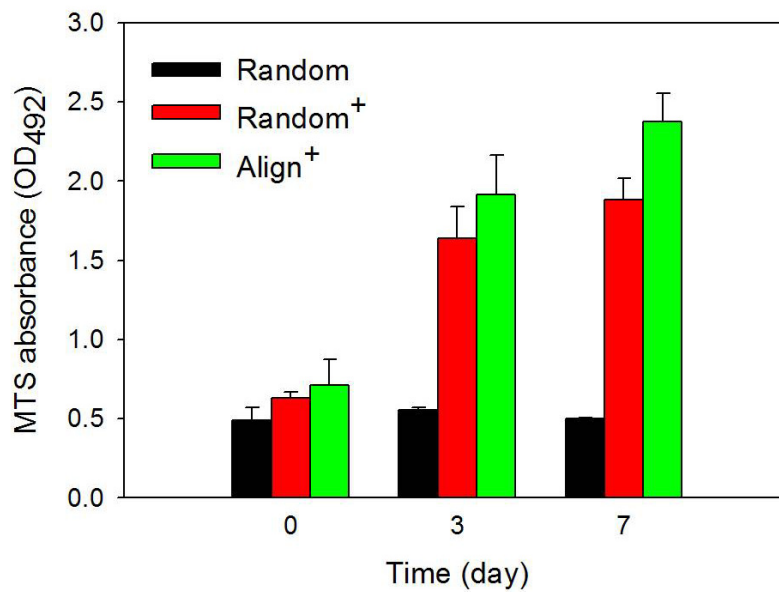

**Figure S2.** The proliferation of tenocytes on tissue culture polystyrene (TCPS) after cultured with 3-day extract of Random, Random<sup>+</sup> or Align<sup>+</sup> core-sheath nanofiber membrane scaffold (CSNMS). The viable cell number was determined by MTS assay from solution absorbance at 492 nm (OD<sub>492</sub>).
